# Supplementary material for: Pinning–depinning transition of droplets on inclined substrates with a three-dimensional topographical defect
Source: Royal Society of Chemistry journal article supplement (doi:10.1039/d4sm00081a), 2024-01-01
Supplement: d4sm00081a1.pdf [file d4sm00081a1.pdf]

## Supplementary information

### Pinning-depinning transition of droplets on inclined substrates with a three-dimensional topographical defect

Ninad V. Mhatre and Satish Kumar

Department of Chemical Engineering and Materials Science, University of Minnesota,  
Minneapolis, MN 55455, USA

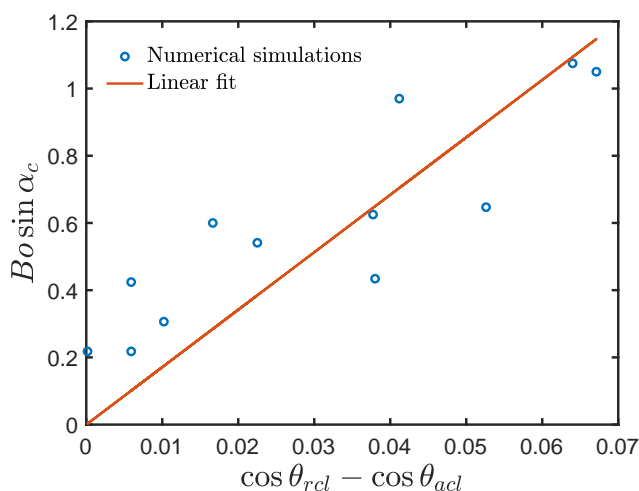

Figure 1:  $Bo \sin \alpha_c$  vs.  $\cos \theta_{rcl} - \cos \theta_{acl}$ . The open blue circles are numerical calculations and the solid red line is a linear fit to the numerical calculations.

Here, we try calculating the value of the retention-force factor  $k$  in  $Bo \sin \alpha_c = k(\cos \theta_{rcl} - \cos \theta_{acl})$  for a substrate with a topographical defect. This is done by extracting the values of  $\theta_{rcl}$ ,  $\theta_{acl}$ , and  $Bo \sin \alpha$  just before the droplet depins for all the defect geometries presented in §3, and fitting a straight line with an intercept at  $y = 0$  to  $Bo \sin \alpha_c$  vs.  $\cos \theta_{rcl} - \cos \theta_{acl}$ .

Figure 1 shows  $Bo \sin \alpha_c$  vs.  $\cos \theta_{rcl} - \cos \theta_{acl}$ , where the open blue circles are numerical calculations and the solid red line is a linear fit. It can be seen that the numerical calculations do not agree well with the linear fit. This likely happens because  $k$  is assumed to be a constant in  $Bo \sin \alpha_c = k(\cos \theta_{rcl} - \cos \theta_{acl})$ , but the value of  $k$  is expected to depend on the defect dimensions which are different for all the numerical calculations. The value of  $k$  for a given defect geometry can be obtained by calculating  $\alpha_c$  for different  $Bo$  values and repeating the procedure described above, but such a calculation is beyond the scope of the present paper.
